# Supplementary material for: Strong population structure but no equilibrium yet: Genetic connectivity and phylogeography in the kelp Saccharina latissima (Laminariales, Phaeophyta)
Source: PubMed Central journal article supplement (PMC5916297; doi:10.1002/ece3.3968), 2018-04-02

Fig. S1

SB (1)  
vs.  
SF (2)

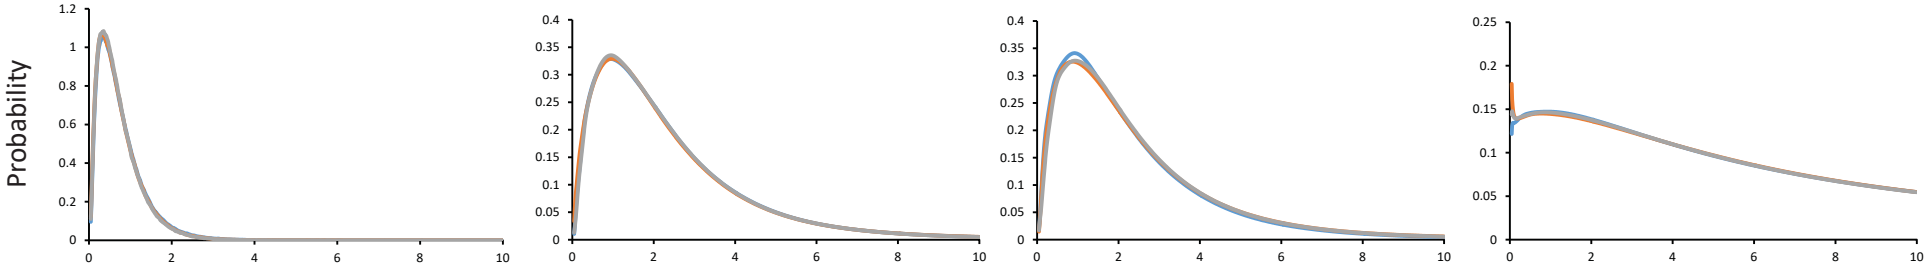

SF (1)  
vs.  
NWA (2)

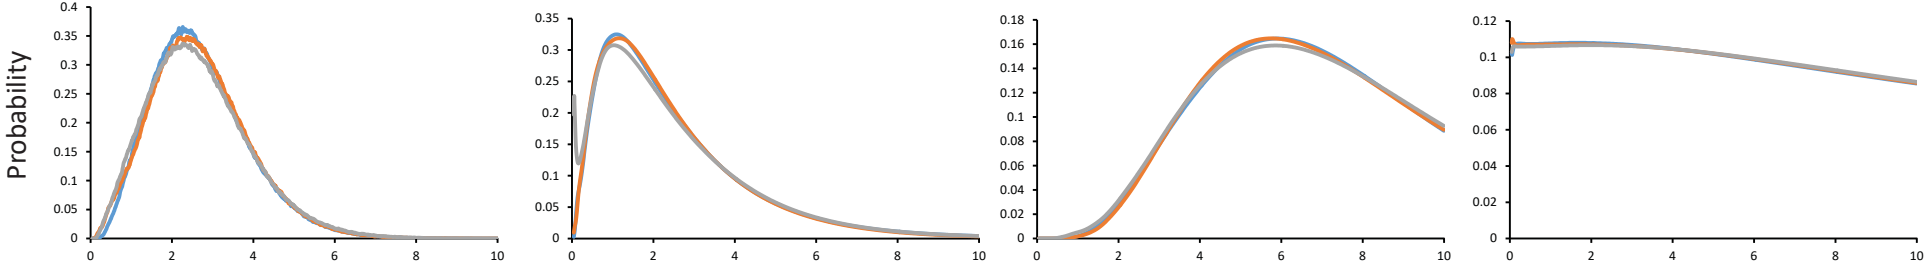

SB (1)  
vs.  
NWA (2)

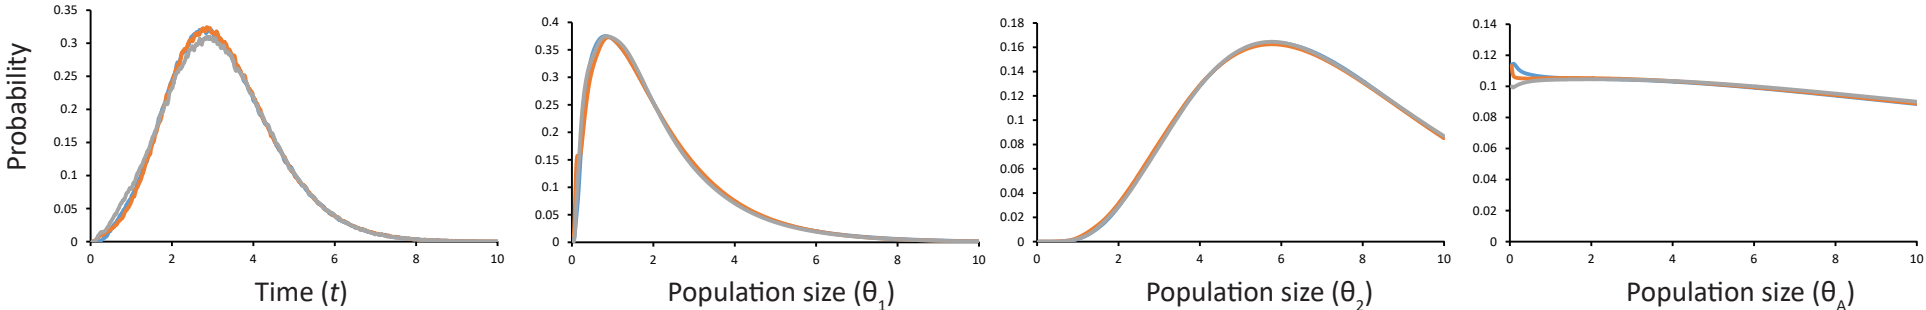

Supplement: ECE3-8-4265-s001.pdf [file ECE3-8-4265-s001.pdf]
