# Supplementary material for: Strong population structure but no equilibrium yet: Genetic connectivity and phylogeography in the kelp Saccharina latissima (Laminariales, Phaeophyta)
Source: PubMed Central journal article supplement (PMC5916297; doi:10.1002/ece3.3968), 2018-04-02
Supplement: ECE3-8-4265-s002.pdf [file ECE3-8-4265-s002.pdf]

| marker       | repeat        | repeat_type       | SRR305166_readno | primer_f                   | primer_r                     | Tm_f         | Tm_r         | expected_fragment_size | N <sub>alleles</sub> | size range (bp) |
|--------------|---------------|-------------------|------------------|----------------------------|------------------------------|--------------|--------------|------------------------|----------------------|-----------------|
| Lat01        | (AT)8         | di-repeat         | 100157           | TCGTCATTAGGGACACGCC        | TGACGCGTTTCCATTTCCGG         | 60.23        | 59.87        | 301                    |                      |                 |
| Lat02        | (AG)6         | di-repeat         | 191744           | AAGATCACGGAGGCGATCC        | TCACTCACTGCGAAGGTGG          | 60.01        | 60.38        | 242                    |                      |                 |
| Lat03        | (AT)8         | di-repeat         | 179145           | ATAACTTGCCGCCACGGAG        | GGTACTCGAATGCACACTCTTG       | 61.2         | 60.08        | 231                    |                      |                 |
| Lat04        | (AT)7         | di-repeat         | 210618           | TCCATCCTTCATGGCGGTC        | ACGTTCTGCAGCTTTGACG          | 60.23        | 59.79        | 351                    |                      |                 |
| <b>Lat05</b> | <b>(AT)6</b>  | <b>di-repeat</b>  | <b>213571</b>    | <b>GGTTCGGCCTTTGCTAGTC</b> | <b>GTTGCTGCCTTCTAAGCG</b>    | <b>59.27</b> | <b>59.94</b> | <b>176</b>             | <b>2</b>             | <b>192-194</b>  |
| Lat06        | (AT)6         | di-repeat         | 293080           | GAATGGACAACGGCCACAG        | AGGACGGAACCGACCATAC          | 59.86        | 59.56        | 397                    |                      |                 |
| Lat07        | (GCT)6        | tri-repeat        | 160768           | ACGGTTGGTTACAGTCGGG        | CCGGAACATCACGTCAAGC          | 60.38        | 59.94        | 290                    |                      |                 |
| <b>Lat08</b> | <b>(GGT)4</b> | <b>tri-repeat</b> | <b>236061</b>    | <b>GTGGCTGTAGACCGGGTAG</b> | <b>AAGAAGCGCCGCAAAGTTC</b>   | <b>59.93</b> | <b>60.45</b> | <b>375</b>             | <b>3</b>             | <b>389-394</b>  |
| <b>Lat09</b> | <b>(AGC)8</b> | <b>tri-repeat</b> | <b>210681</b>    | <b>CGCCCTTGTAATCTCAGC</b>  | <b>GCCATCTTCAAGTCACCAACG</b> | <b>59.64</b> | <b>60.55</b> | <b>220</b>             | <b>6</b>             | <b>229-244</b>  |
| Lat10        | (GAT)4        | tri-repeat        | 130020           | TCGTGTGAAGGGTTGAGGC        | TGTCACACTGCGAACCC            | 60.68        | 60.68        | 225                    |                      |                 |
| Lat11        | (AAC)4        | tri-repeat        | 329446           | GCGCCAACGATCAGTATCC        | TCAGTGGCCTGTCACTACG          | 59.50        | 59.78        | 171                    |                      |                 |
| Lat12        | (GGT)7        | tri-repeat        | 307144           | TACGGTAGAACGGTCGCTG        | GTGTCACACTGCGAAGC            | 59.94        | 59.87        | 297                    |                      |                 |
| Lat13        | (CT)6         | di-repeat         | 131242           | CCGTGCGACGTATTTGGTC        | CACTGCGAAGGGCAGATAAC         | 60.01        | 59.73        | 212                    |                      |                 |
| Lat14        | (CA)6         | di-repeat         | 132283           | CCCTACCACTTCGAGTGCC        | GTACGTCCTTCGGGACACC          | 60.53        | 60.53        | 235                    |                      |                 |
| <b>Lat15</b> | <b>(CA)6</b>  | <b>di-repeat</b>  | <b>135701</b>    | <b>ACGGGTAGAAAGGACGGTG</b> | <b>TACGCTGTAGAGCAGTCCG</b>   | <b>59.78</b> | <b>59.64</b> | <b>150</b>             | <b>5</b>             | <b>163-171</b>  |
| Lat16        | (GA)7         | di-repeat         | 137304           | CGGAGGATCCCAGATGGC         | CTGTCACACTGCGAAGC            | 60.01        | 59.58        | 348                    |                      |                 |
| Lat17        | (TA)9         | di-repeat         | 140102           | CCCTTGGACCTTGACAAC         | GTACCGGGAACGGGAAACC          | 58.72        | 61.12        | 253                    |                      |                 |
| <b>Lat18</b> | <b>(TA)5</b>  | <b>di-repeat</b>  | <b>143539</b>    | <b>TTTCACATCTCGGACGGGC</b> | <b>TGCGCAGGATCTGTTCAAGG</b>  | <b>60.83</b> | <b>60.83</b> | <b>254</b>             | <b>4</b>             | <b>271-277</b>  |
| <b>Lat19</b> | <b>(GT)13</b> | <b>di-repeat</b>  | <b>147678</b>    | <b>GAAACGTGCTAGACGCTGG</b> | <b>GTACGATTGCGTCCATGCC</b>   | <b>59.65</b> | <b>60.09</b> | <b>169</b>             | <b>27</b>            | <b>174-233</b>  |
| Lat20        | (GC)6         | di-repeat         | 152716           | GGGCCAAGCATTGCGATAG        | TTAAGGGTCCCGGAAAGCG          | 60.08        | 60.46        | 311                    |                      |                 |
| Lat21        | (CT)13        | di-repeat         | 157991           | AGCTTCTTGGGCGGTTTC         | CCTCGTGTGGCCTTCGG            | 59.41        | 60.82        | 312                    |                      |                 |
| Lat22        | (CG)6         | di-repeat         | 280958           | CCGTCCGGTTACCTTTGAC        | TCTGTCGCTTTGACGCG            | 58.91        | 61.15        | 282                    |                      |                 |
| Lat23        | (CAG)5        | tri-repeat        | 110848           | GCTGTGAGCTCGAGGATTTTC      | TACGGAGTACGTTCCGGTGG         | 59.45        | 59.57        | 387                    |                      |                 |
| Lat24        | (CGT)6        | tri-repeat        | 142768           | GACCCTCCCGTACGAAACC        | CCTACCACAGTACGGAACG          | 60.53        | 60.57        | 340                    |                      |                 |
| <b>Lat25</b> | <b>(TGC)6</b> | <b>tri-repeat</b> | <b>160375</b>    | <b>CGCGTGTTACCATCGTCAG</b> | <b>TCTTCGCTGTTCCGAGGAC</b>   | <b>59.73</b> | <b>60.16</b> | <b>192</b>             | <b>2</b>             | <b>219-223</b>  |
| Lat26        | (TGC)6        | tri-repeat        | 172368           | CTGGTCGTCTGCATTCTGG        | CAGTTTCGTGCGCTACTGC          | 58.98        | 59.65        | 259                    |                      |                 |
| Lat27        | (GAT)4        | tri-repeat        | 180792           | AGCTGTCTTGACCTGGCG         | GACGAAAGCAGGAAAGGTCG         | 60.40        | 59.94        | 242                    |                      |                 |
| Lat28        | (GAC)3        | tri-repeat        | 192623           | CGGATACGTAACGACGAG         | TGCGAATGGCGGTAGATCG          | 60.52        | 61.04        | 321                    |                      |                 |
| Lat29        | (TGC)7        | tri-repeat        | 212432           | CTGCTGCTCGCCATTCATC        | GTCACACTGCGAAAGGG            | 60.09        | 59.20        | 151                    |                      |                 |
| Lat30        | (GCT)4        | tri-repeat        | 224821           | GGGCAGTGGTCGTAGATCC        | CACCATTGCGCTGCAAGTC          | 60.31        | 60.23        | 281                    |                      |                 |
| Lat31        | (CAG)3        | tri-repeat        | 253424           | CGTACGTGCCAACGATGAG        | TCCACTCACTGCGAAGAGC          | 59.73        | 60.45        | 389                    |                      |                 |
| Lat32        | (GCT)6        | tri-repeat        | 301446           | CGGAAGATCCACGCGATTG        | CACACGAACAAGTACCGGC          | 59.80        | 59.87        | 316                    |                      |                 |

|              |              |                  |               |                            |                            |              |              |            |          |                |
|--------------|--------------|------------------|---------------|----------------------------|----------------------------|--------------|--------------|------------|----------|----------------|
| <b>Lat33</b> | <b>(CT)6</b> | <b>di-repeat</b> | <b>201581</b> | <b>ATCCCGTCTTTCTCGGTGG</b> | <b>GTGGCTCGCGATTCAAGG</b>  | <b>59.86</b> | <b>60.30</b> | <b>176</b> | <b>3</b> | <b>195-199</b> |
| <b>Lat34</b> | <b>(AT)6</b> | <b>di-repeat</b> | <b>203232</b> | <b>AGAACAAGACCGCTCAGGC</b> | <b>AGGGCGGTTCTTCTACGAG</b> | <b>60.75</b> | <b>59.56</b> | <b>229</b> | <b>7</b> | <b>238-250</b> |
| Lat35        | (TA)10       | di-repeat        | 283134        | TGTCAAGGACCGCTTTGGG        | CTCACTGCGAAGAGCCAAC        | 60.99        | 59.57        | 160        |          |                |
| Lat36        | (GA)10       | di-repeat        | 231456        | GGTTCGAATCCCAGCTACG        | CCTCGGTCAGTCTCAGTGG        | 58.76        | 59.86        | 292        |          |                |
| <b>Lat37</b> | <b>(GT)7</b> | <b>di-repeat</b> | <b>278229</b> | <b>GTGGTGCGCAGGAAAGTG</b>  | <b>GACCACCTTGAGACCTCCG</b> | <b>60.09</b> | <b>60.16</b> | <b>330</b> | <b>6</b> | <b>348-358</b> |
| Lat38        | (TGC)5       | tri-repeat       | 208821        | AGCCAGTAACCGACGAAGG        | GTCCCGGTTGATAAACGC         | 60.16        | 59.72        | 275        |          |                |
| Lat39        | (GCT)8       | tri-repeat       | 208854        | TCTTCTCGACCCACTCGTTG       | CCTGTCACTCACTGCGAAC        | 60.15        | 59.21        | 191        |          |                |
| Lat40        | (CGA)6       | tri-repeat       | 240939        | CACGCGACTTTCTAAGCG         | CTCACTGCGAAGTTGGTGC        | 60.02        | 60.16        | 166        |          |                |
| Lat41        | (CAG)8       | tri-repeat       | 241080        | TGAGCCCGATAGCACCAAG        | CCTCCGGAATAGCCACCTC        | 60.23        | 60.01        | 197        |          |                |
| Lat42        | (GAT)6       | tri-repeat       | 241630        | ACTGGGTAAGGGAAGGATGC       | TCTACGGAGGGTTATCGAGC       | 59.86        | 59.15        | 151        |          |                |
