# Supplementary material for: Strong population structure but no equilibrium yet: Genetic connectivity and phylogeography in the kelp Saccharina latissima (Laminariales, Phaeophyta)
Source: PubMed Central journal article supplement (PMC5916297; doi:10.1002/ece3.3968), 2018-04-02
Supplement: ECE3-8-4265-s003.pdf [file ECE3-8-4265-s003.pdf]

| ind  | lat05 | lat08 |     | lat09 |     | lat15 |      | lat18 |      | lat19 |     | lat25 |     | lat33 |     | lat34 |      | lat37 |      |      |
|------|-------|-------|-----|-------|-----|-------|------|-------|------|-------|-----|-------|-----|-------|-----|-------|------|-------|------|------|
| SB01 | 192   | 192   | 389 | 394   | 235 | 235   | 163  | 165   | 273  | 273   | 176 | 180   | 220 | 220   | 197 | 197   | 240  | 240   | 352  | 352  |
| SB02 | 192   | 192   | 389 | 394   | 235 | 235   | 163  | 163   | 277  | 277   | 174 | 180   | 220 | 220   | 195 | 197   | 240  | 240   | #N/A | #N/A |
| SB03 | 192   | 192   | 389 | 394   | 235 | 235   | 165  | 167   | 273  | 275   | 176 | 176   | 219 | 220   | 195 | 195   | 242  | 242   | 350  | 352  |
| SB04 | 192   | 192   | 394 | 394   | 235 | 235   | 165  | 165   | 273  | 273   | 202 | 233   | 220 | 220   | 197 | 197   | 240  | 240   | 350  | 352  |
| SB05 | 192   | 192   | 394 | 394   | 235 | 235   | 163  | 165   | 273  | 273   | 178 | 218   | 220 | 220   | 197 | 197   | 242  | 242   | 352  | 352  |
| SB06 | 192   | 192   | 394 | 394   | 235 | 235   | 163  | 165   | 275  | 275   | 178 | 178   | 219 | 220   | 195 | 197   | 240  | 242   | 352  | 352  |
| SB07 | 192   | 192   | 389 | 394   | 235 | 235   | 165  | 165   | 271  | 273   | 178 | 220   | 220 | 220   | 197 | 197   | 240  | 242   | 350  | 352  |
| SB08 | 192   | 192   | 394 | 394   | 235 | 235   | 165  | 165   | 271  | 271   | 176 | 204   | 219 | 220   | 195 | 197   | 240  | 242   | 352  | 352  |
| SB09 | 192   | 192   | 394 | 394   | 235 | 235   | 165  | 165   | 275  | 275   | 206 | 223   | 219 | 220   | 197 | 197   | 240  | 240   | 350  | 352  |
| SB10 | 192   | 192   | 394 | 394   | 235 | 235   | 165  | 167   | 271  | 271   | 202 | 212   | 219 | 220   | 197 | 197   | 240  | 242   | 352  | 352  |
| SB11 | 192   | 192   | 389 | 394   | 235 | 235   | 163  | 165   | 273  | 273   | 176 | 233   | 220 | 220   | 195 | 197   | 240  | 240   | 352  | 352  |
| SB12 | 192   | 192   | 394 | 394   | 235 | 235   | 163  | 165   | #N/A | #N/A  | 176 | 223   | 220 | 220   | 197 | 197   | #N/A | #N/A  | 352  | 352  |
| SB13 | 192   | 192   | 394 | 394   | 235 | 235   | 165  | 165   | 273  | 273   | 176 | 198   | 219 | 220   | 197 | 197   | 240  | 240   | 352  | 352  |
| SB14 | 192   | 192   | 389 | 394   | 235 | 235   | 163  | 163   | 273  | 273   | 176 | 210   | 219 | 220   | 197 | 197   | 240  | 240   | #N/A | #N/A |
| SB15 | 192   | 192   | 394 | 394   | 235 | 235   | 163  | 165   | 273  | 273   | 174 | 233   | 219 | 220   | 195 | 197   | 240  | 242   | 352  | 352  |
| SB16 | 192   | 192   | 394 | 394   | 235 | 235   | 165  | 165   | 273  | 273   | 176 | 223   | 220 | 220   | 197 | 197   | 240  | 242   | 350  | 352  |
| SB17 | 192   | 192   | 394 | 394   | 235 | 235   | 165  | 165   | 275  | 277   | 176 | 176   | 220 | 220   | 195 | 197   | 240  | 240   | 352  | 352  |
| SB18 | 192   | 192   | 394 | 394   | 235 | 235   | 163  | 165   | 271  | 271   | 178 | 212   | 220 | 220   | 197 | 197   | 240  | 240   | 352  | 352  |
| SB19 | 192   | 192   | 394 | 394   | 235 | 235   | 165  | 165   | 273  | 273   | 178 | 178   | 220 | 220   | 197 | 197   | 240  | 242   | 352  | 352  |
| SB20 | 192   | 192   | 394 | 394   | 238 | 238   | 165  | 165   | 273  | 273   | 185 | 187   | 220 | 220   | 197 | 197   | 238  | 244   | 352  | 358  |
| SB20 | 192   | 192   | 394 | 394   | 235 | 235   | #N/A | #N/A  | 273  | 273   | 180 | 218   | 220 | 220   | 197 | 197   | 240  | 242   | 352  | 352  |
| SB21 | 192   | 192   | 389 | 394   | 235 | 235   | 163  | 165   | #N/A | #N/A  | 176 | 176   | 219 | 220   | 195 | 197   | 242  | 242   | 352  | 352  |
| SB22 | 192   | 192   | 389 | 394   | 235 | 235   | 163  | 165   | 273  | 273   | 176 | 220   | 219 | 220   | 195 | 197   | 240  | 240   | 350  | 352  |
| SB23 | 192   | 192   | 394 | 394   | 235 | 235   | 163  | 165   | 273  | 273   | 176 | 178   | 220 | 220   | 197 | 197   | 240  | 240   | 352  | 352  |
| SB24 | 192   | 192   | 394 | 394   | 235 | 235   | 165  | 165   | 271  | 277   | 178 | 225   | 220 | 220   | 195 | 197   | 240  | 242   | 350  | 352  |
| SB25 | 192   | 192   | 389 | 394   | 235 | 235   | 167  | 167   | 273  | 273   | 176 | 178   | 219 | 220   | 195 | 197   | 240  | 240   | 352  | 352  |
| SB26 | 192   | 192   | 389 | 394   | 235 | 235   | 165  | 165   | 273  | 273   | 206 | 208   | 220 | 220   | 197 | 197   | 240  | 240   | 350  | 350  |
| SB27 | 192   | 192   | 394 | 394   | 235 | 235   | 163  | 165   | #N/A | #N/A  | 176 | 178   | 220 | 220   | 197 | 197   | 240  | 242   | #N/A | #N/A |
| SB28 | 192   | 192   | 394 | 394   | 235 | 235   | 163  | 165   | 271  | 271   | 180 | 210   | 219 | 220   | 195 | 197   | 242  | 242   | 352  | 352  |
| SB29 | 192   | 192   | 394 | 394   | 235 | 235   | 165  | 165   | 273  | 273   | 178 | 178   | 220 | 220   | 195 | 197   | 240  | 244   | 352  | 352  |
| SB30 | 192   | 192   | 394 | 394   | 235 | 235   | 165  | 165   | #N/A | #N/A  | 178 | 180   | 220 | 220   | 197 | 197   | 240  | 240   | 352  | 352  |
| SB31 | 192   | 192   | 394 | 394   | 235 | 235   | 165  | 165   | 273  | 273   | 178 | 223   | 220 | 220   | 197 | 197   | 240  | 242   | 352  | 352  |

| ind  | lat05 | lat08 | lat09 | lat15 | lat18 | lat19 | lat25 | lat33 | lat34 | lat37 |      |      |     |     |      |      |      |      |      |      |
|------|-------|-------|-------|-------|-------|-------|-------|-------|-------|-------|------|------|-----|-----|------|------|------|------|------|------|
| SB32 | 192   | 192   | 389   | 394   | 235   | 235   | 165   | 167   | 273   | 273   | 174  | 178  | 220 | 220 | 195  | 197  | 240  | 240  | 352  | 352  |
| SD01 | 192   | 194   | 394   | 394   | 235   | 235   | 165   | 165   | 273   | 273   | 180  | 193  | 220 | 220 | 195  | 195  | 242  | 244  | 352  | 352  |
| SD02 | 194   | 194   | 394   | 394   | 235   | 238   | 165   | 167   | 273   | 273   | 195  | 204  | 220 | 220 | #N/A | #N/A | #N/A | #N/A | 352  | 352  |
| SD03 | 192   | 192   | 394   | 394   | 235   | 235   | 165   | 167   | 273   | 273   | 180  | 189  | 220 | 220 | #N/A | #N/A | #N/A | #N/A | #N/A | #N/A |
| SD04 | 192   | 194   | 394   | 394   | 235   | 235   | 165   | 165   | #N/A  | #N/A  | 183  | 198  | 220 | 220 | #N/A | #N/A | #N/A | #N/A | #N/A | #N/A |
| SD05 | 192   | 194   | 394   | 394   | 235   | 235   | 163   | 165   | 273   | 273   | 180  | 193  | 220 | 220 | 197  | 197  | 244  | 244  | 352  | 352  |
| SD06 | 194   | 194   | 394   | 394   | 235   | 235   | 165   | 165   | 273   | 273   | 191  | 195  | 220 | 220 | 197  | 197  | 244  | 244  | 352  | 352  |
| SD07 | 192   | 194   | 394   | 394   | 238   | 238   | 165   | 165   | 273   | 273   | 180  | 180  | 220 | 220 | 195  | 197  | #N/A | #N/A | #N/A | #N/A |
| SD08 | 192   | 192   | 394   | 394   | 235   | 238   | 163   | 165   | 273   | 273   | 193  | 195  | 220 | 220 | 197  | 197  | #N/A | #N/A | 352  | 352  |
| SD09 | 192   | 192   | 394   | 394   | 235   | 235   | 163   | 165   | 273   | 273   | 178  | 180  | 220 | 220 | 195  | 197  | 244  | 244  | 352  | 352  |
| SD10 | 194   | 194   | 394   | 394   | 238   | 238   | 163   | 165   | 273   | 273   | 180  | 195  | 220 | 220 | #N/A | #N/A | 244  | 244  | 352  | 352  |
| SD11 | #N/A  | #N/A  | 394   | 394   | 235   | 238   | 163   | 165   | #N/A  | #N/A  | 180  | 202  | 220 | 220 | #N/A | #N/A | #N/A | #N/A | 352  | 352  |
| SD12 | 192   | 194   | 394   | 394   | 235   | 235   | 167   | 167   | 273   | 273   | #N/A | #N/A | 220 | 220 | 197  | 197  | #N/A | #N/A | #N/A | #N/A |
| SD13 | 194   | 194   | 394   | 394   | 235   | 238   | 163   | 163   | 273   | 273   | 180  | 193  | 220 | 220 | 197  | 197  | #N/A | #N/A | #N/A | #N/A |
| SD14 | 194   | 194   | 394   | 394   | 235   | 238   | 165   | 165   | 273   | 273   | 189  | 191  | 220 | 220 | #N/A | #N/A | #N/A | #N/A | #N/A | #N/A |
| SD15 | 192   | 194   | 394   | 394   | 235   | 235   | 165   | 165   | 273   | 273   | 176  | 180  | 220 | 220 | 197  | 197  | #N/A | #N/A | 352  | 352  |
| SD16 | 192   | 192   | 394   | 394   | 235   | 238   | 165   | 165   | 273   | 273   | 178  | 198  | 220 | 220 | 197  | 197  | #N/A | #N/A | 352  | 352  |
| SD17 | 194   | 194   | 394   | 394   | 235   | 235   | 165   | 165   | 273   | 273   | 180  | 193  | 220 | 220 | 195  | 195  | 244  | 244  | 352  | 352  |
| SD18 | 194   | 194   | 394   | 394   | 235   | 238   | 165   | 165   | 273   | 273   | 189  | 198  | 220 | 220 | #N/A | #N/A | 244  | 244  | 352  | 352  |
| SD19 | 192   | 194   | 394   | 394   | 235   | 235   | 165   | 165   | #N/A  | #N/A  | 180  | 180  | 220 | 220 | #N/A | #N/A | 244  | 244  | #N/A | #N/A |
| SD20 | 192   | 194   | 394   | 394   | 238   | 238   | 163   | 163   | 273   | 273   | 176  | 180  | 220 | 220 | 195  | 197  | 244  | 244  | 352  | 352  |
| SD21 | 194   | 194   | 394   | 394   | 235   | 238   | 163   | 163   | 273   | 273   | 180  | 193  | 220 | 220 | 197  | 197  | 244  | 244  | 352  | 352  |
| SD22 | 192   | 192   | 394   | 394   | 235   | 235   | 165   | 165   | #N/A  | #N/A  | 198  | 198  | 220 | 220 | #N/A | #N/A | #N/A | #N/A | 352  | 352  |
| SF01 | 192   | 194   | 389   | 394   | 235   | 235   | 165   | 165   | 273   | 273   | 180  | 204  | 220 | 220 | 197  | 197  | 244  | 244  | 352  | 352  |
| SF02 | 194   | 194   | 394   | 394   | 229   | 235   | 165   | 165   | 273   | 275   | 185  | 185  | 220 | 220 | 197  | 197  | 244  | 244  | 352  | 352  |
| SF03 | 192   | 194   | 394   | 394   | 232   | 235   | 165   | 165   | 273   | 273   | 183  | 185  | 220 | 220 | 197  | 197  | 244  | 244  | 352  | 352  |
| SF04 | 194   | 194   | 394   | 394   | 235   | 235   | 163   | 163   | 273   | 273   | 183  | 204  | 220 | 220 | 197  | 197  | 244  | 244  | 350  | 352  |
| SF05 | 192   | 192   | 389   | 394   | 235   | 241   | 165   | 165   | 273   | 273   | 180  | 183  | 220 | 220 | 197  | 197  | 242  | 244  | 352  | 352  |
| SF06 | 192   | 194   | #N/A  | #N/A  | 235   | 238   | 165   | 165   | 273   | 273   | 178  | 185  | 220 | 220 | 197  | 197  | 244  | 244  | 352  | 352  |
| SF07 | 192   | 194   | 389   | 394   | 235   | 238   | 165   | 165   | #N/A  | #N/A  | 178  | 183  | 220 | 220 | 197  | 197  | 244  | 244  | 352  | 352  |
| SF08 | 192   | 194   | 394   | 394   | 232   | 235   | 165   | 165   | 273   | 273   | 183  | 189  | 220 | 220 | 197  | 197  | 244  | 244  | 352  | 352  |
| SF09 | 192   | 194   | 394   | 394   | 235   | 238   | 165   | 165   | 273   | 273   | 180  | 183  | 220 | 220 | 197  | 197  | 244  | 244  | 352  | 354  |

| ind  | lat05 | lat08 | lat09 | lat15 | lat18 | lat19 | lat25 | lat33 | lat34 | lat37 |     |     |     |     |     |     |     |     |      |      |
|------|-------|-------|-------|-------|-------|-------|-------|-------|-------|-------|-----|-----|-----|-----|-----|-----|-----|-----|------|------|
| SF10 | 192   | 194   | 389   | 394   | 235   | 238   | 165   | 165   | 273   | 273   | 183 | 183 | 220 | 220 | 197 | 197 | 244 | 244 | 350  | 352  |
| SF11 | 192   | 194   | 394   | 394   | 235   | 244   | 163   | 165   | 273   | 273   | 180 | 185 | 220 | 220 | 197 | 197 | 244 | 244 | 350  | 352  |
| SF12 | 194   | 194   | 394   | 394   | 235   | 238   | 165   | 165   | 273   | 273   | 183 | 183 | 220 | 220 | 197 | 197 | 244 | 244 | 352  | 352  |
| SF13 | 192   | 192   | 394   | 394   | 235   | 238   | 163   | 165   | 273   | 273   | 183 | 185 | 220 | 220 | 197 | 197 | 244 | 244 | 352  | 352  |
| SF14 | 192   | 192   | 394   | 394   | 235   | 235   | 165   | 165   | 273   | 273   | 180 | 183 | 220 | 220 | 197 | 197 | 244 | 244 | 352  | 352  |
| SF15 | 192   | 194   | 394   | 394   | 232   | 235   | 165   | 165   | 273   | 273   | 183 | 185 | 220 | 220 | 197 | 197 | 244 | 244 | 352  | 352  |
| SF16 | 192   | 194   | 394   | 394   | 235   | 238   | 163   | 165   | 273   | 273   | 178 | 178 | 220 | 220 | 197 | 197 | 242 | 244 | 352  | 352  |
| SF17 | 192   | 194   | 394   | 394   | 235   | 238   | 165   | 165   | 273   | 273   | 183 | 187 | 220 | 220 | 197 | 197 | 244 | 244 | 352  | 352  |
| SF18 | #N/A  | #N/A  | 394   | 394   | 235   | 235   | 165   | 165   | 273   | 273   | 180 | 183 | 219 | 219 | 197 | 197 | 244 | 244 | 352  | 352  |
| SF19 | #N/A  | #N/A  | 394   | 394   | 235   | 235   | 163   | 165   | 273   | 273   | 178 | 187 | 219 | 219 | 197 | 197 | 244 | 244 | 352  | 352  |
| SF20 | #N/A  | #N/A  | 394   | 394   | 235   | 235   | 165   | 165   | 273   | 273   | 185 | 185 | 219 | 219 | 197 | 197 | 238 | 244 | 352  | 352  |
| SF21 | #N/A  | #N/A  | 394   | 394   | 235   | 235   | 165   | 165   | 273   | 273   | 180 | 185 | 219 | 219 | 197 | 197 | 244 | 244 | 348  | 352  |
| SF22 | #N/A  | #N/A  | 394   | 394   | 235   | 235   | 165   | 165   | 273   | 273   | 180 | 185 | 219 | 219 | 197 | 197 | 242 | 244 | 348  | 352  |
| SF23 | #N/A  | #N/A  | 394   | 394   | 235   | 235   | 163   | 163   | 273   | 273   | 180 | 204 | 219 | 219 | 197 | 197 | 244 | 244 | 352  | 352  |
| SF24 | #N/A  | #N/A  | 394   | 394   | 235   | 235   | 165   | 165   | 273   | 273   | 185 | 200 | 219 | 219 | 197 | 197 | 244 | 244 | 350  | 352  |
| SF25 | #N/A  | #N/A  | 394   | 394   | 235   | 235   | 165   | 165   | 273   | 273   | 185 | 195 | 219 | 219 | 197 | 199 | 238 | 244 | 348  | 354  |
| SF26 | #N/A  | #N/A  | 394   | 394   | 235   | 235   | 165   | 165   | 273   | 273   | 180 | 180 | 219 | 219 | 197 | 197 | 244 | 244 | 352  | 358  |
| SF27 | #N/A  | #N/A  | 394   | 394   | 235   | 235   | 165   | 165   | 273   | 273   | 180 | 180 | 219 | 219 | 197 | 197 | 244 | 244 | 350  | 352  |
| SF28 | #N/A  | #N/A  | 394   | 394   | 235   | 235   | 165   | 165   | 273   | 273   | 180 | 187 | 219 | 219 | 197 | 197 | 244 | 244 | 350  | 352  |
| SF29 | #N/A  | #N/A  | 394   | 394   | 235   | 235   | 165   | 165   | 273   | 273   | 178 | 185 | 219 | 219 | 197 | 197 | 244 | 244 | 352  | 354  |
| SF30 | #N/A  | #N/A  | 394   | 394   | 235   | 235   | 163   | 163   | 273   | 273   | 180 | 185 | 219 | 219 | 197 | 197 | 244 | 244 | 352  | 352  |
| SF31 | #N/A  | #N/A  | 394   | 394   | 235   | 235   | 163   | 165   | 273   | 273   | 178 | 193 | 219 | 219 | 197 | 197 | 242 | 244 | 350  | 352  |
| SF32 | #N/A  | #N/A  | 394   | 394   | 235   | 235   | 163   | 165   | 273   | 273   | 185 | 187 | 219 | 219 | 195 | 199 | 244 | 244 | 354  | 354  |
| SI01 | 192   | 192   | 394   | 394   | 235   | 235   | 163   | 165   | 273   | 273   | 180 | 193 | 220 | 220 | 197 | 199 | 242 | 242 | #N/A | #N/A |
| SI02 | 192   | 192   | 392   | 394   | 238   | 238   | 165   | 167   | 273   | 273   | 178 | 187 | 220 | 220 | 197 | 197 | 242 | 244 | 352  | 352  |
| SI03 | 192   | 192   | 394   | 394   | 235   | 238   | 163   | 165   | 273   | 273   | 178 | 180 | 220 | 220 | 197 | 197 | 242 | 242 | 352  | 352  |
| SI04 | 192   | 192   | 394   | 394   | 235   | 235   | 165   | 165   | 273   | 273   | 180 | 183 | 220 | 220 | 197 | 197 | 242 | 242 | 350  | 352  |
| SI05 | 192   | 192   | 389   | 394   | 238   | 238   | 165   | 165   | 273   | 273   | 183 | 185 | 219 | 220 | 197 | 197 | 242 | 242 | 352  | 352  |
| SI06 | 192   | 192   | 394   | 394   | 238   | 238   | 165   | 165   | 273   | 273   | 183 | 191 | 220 | 220 | 197 | 197 | 242 | 244 | 352  | 352  |
| SI07 | 192   | 192   | 394   | 394   | 235   | 235   | 163   | 163   | 273   | 273   | 187 | 198 | 220 | 220 | 197 | 197 | 244 | 244 | 352  | 352  |
| SI08 | 192   | 192   | 394   | 394   | 238   | 238   | 165   | 171   | 273   | 273   | 180 | 185 | 220 | 220 | 197 | 197 | 242 | 244 | 352  | 352  |
| SI09 | 192   | 192   | 394   | 394   | 238   | 238   | 163   | 163   | 273   | 273   | 178 | 183 | 220 | 220 | 197 | 197 | 242 | 244 | 350  | 352  |

| ind  | lat05 | lat08 |     | lat09 |     | lat15 |      | lat18 |      | lat19 |     | lat25 |     | lat33 |      | lat34 |     | lat37 |      |      |
|------|-------|-------|-----|-------|-----|-------|------|-------|------|-------|-----|-------|-----|-------|------|-------|-----|-------|------|------|
| SI10 | 192   | 192   | 394 | 394   | 238 | 238   | 163  | 165   | 273  | 273   | 183 | 185   | 220 | 220   | 197  | 197   | 242 | 244   | 350  | 352  |
| SI11 | 192   | 192   | 394 | 394   | 235 | 238   | 163  | 165   | 273  | 273   | 178 | 187   | 220 | 220   | 197  | 197   | 242 | 244   | 352  | 352  |
| SI12 | 192   | 192   | 394 | 394   | 235 | 238   | 163  | 165   | 273  | 273   | 180 | 185   | 220 | 220   | 197  | 197   | 238 | 244   | 352  | 352  |
| SI13 | 192   | 192   | 394 | 394   | 235 | 235   | 163  | 165   | 273  | 273   | 185 | 187   | 220 | 220   | 197  | 197   | 242 | 242   | 350  | 352  |
| SI14 | 192   | 192   | 394 | 394   | 235 | 238   | 163  | 165   | 273  | 273   | 180 | 198   | 220 | 220   | 197  | 197   | 238 | 242   | 350  | 350  |
| SI15 | 192   | 192   | 394 | 394   | 235 | 238   | 163  | 165   | 273  | 273   | 183 | 183   | 219 | 220   | 197  | 197   | 242 | 242   | 352  | 352  |
| SI16 | 192   | 192   | 394 | 394   | 235 | 238   | 167  | 169   | 273  | 273   | 178 | 187   | 220 | 220   | 197  | 197   | 242 | 244   | 352  | 352  |
| SI17 | 192   | 194   | 389 | 394   | 235 | 238   | 165  | 165   | 273  | 273   | 189 | 198   | 220 | 220   | 197  | 197   | 242 | 242   | 352  | 352  |
| SI18 | 192   | 192   | 394 | 394   | 235 | 238   | 165  | 165   | 273  | 275   | 180 | 189   | 220 | 220   | 197  | 197   | 242 | 242   | 350  | 352  |
| SI19 | 192   | 192   | 389 | 394   | 235 | 238   | 165  | 165   | 273  | 273   | 183 | 187   | 220 | 223   | 197  | 197   | 242 | 242   | 352  | 352  |
| SI20 | 192   | 192   | 394 | 394   | 235 | 238   | 165  | 165   | 273  | 273   | 191 | 202   | 220 | 220   | 197  | 197   | 244 | 250   | 352  | 352  |
| SI21 | 192   | 192   | 394 | 394   | 235 | 235   | 165  | 165   | 273  | 273   | 178 | 185   | 220 | 220   | 197  | 197   | 242 | 250   | 352  | 352  |
| SI22 | 192   | 192   | 394 | 394   | 235 | 235   | 163  | 165   | 273  | 273   | 180 | 180   | 220 | 220   | 197  | 197   | 242 | 244   | 352  | 352  |
| SI23 | 192   | 192   | 394 | 394   | 235 | 238   | 163  | 165   | 273  | 273   | 180 | 185   | 220 | 220   | 197  | 197   | 238 | 244   | 352  | 352  |
| SI24 | 192   | 192   | 394 | 394   | 235 | 238   | 165  | 167   | 273  | 273   | 183 | 185   | 220 | 220   | 195  | 197   | 242 | 242   | 352  | 352  |
| SI25 | 192   | 192   | 394 | 394   | 235 | 238   | 165  | 165   | 273  | 273   | 185 | 187   | 220 | 220   | 195  | 197   | 242 | 242   | 350  | 352  |
| SI26 | 192   | 192   | 394 | 394   | 235 | 238   | 165  | 165   | 273  | 275   | 185 | 189   | 220 | 220   | 197  | 197   | 242 | 246   | 352  | 352  |
| SI27 | 192   | 194   | 394 | 394   | 238 | 238   | 163  | 165   | 273  | 273   | 187 | 189   | 220 | 220   | 197  | 197   | 242 | 242   | 352  | 352  |
| SI28 | 192   | 192   | 394 | 394   | 235 | 238   | 165  | 165   | 273  | 273   | 178 | 183   | 220 | 220   | 197  | 197   | 242 | 242   | 352  | 352  |
| SI29 | 192   | 192   | 389 | 389   | 238 | 238   | 163  | 165   | 273  | 273   | 185 | 185   | 220 | 220   | 197  | 197   | 242 | 244   | 352  | 352  |
| SI30 | 192   | 192   | 394 | 394   | 238 | 238   | 163  | 165   | 273  | 273   | 183 | 187   | 220 | 220   | 195  | 197   | 242 | 242   | 352  | 352  |
| SL01 | 192   | 192   | 394 | 394   | 235 | 235   | 163  | 165   | 273  | 273   | 180 | 185   | 219 | 220   | 197  | 197   | 244 | 244   | 352  | 352  |
| SL02 | 192   | 192   | 394 | 394   | 235 | 235   | 163  | 165   | 273  | 273   | 183 | 185   | 219 | 220   | 195  | 197   | 242 | 244   | 352  | 358  |
| SL03 | 192   | 192   | 394 | 394   | 235 | 238   | 163  | 165   | 273  | 273   | 180 | 187   | 219 | 220   | 197  | 199   | 244 | 244   | 352  | 352  |
| SL04 | 192   | 192   | 394 | 394   | 235 | 244   | 165  | 165   | 273  | 273   | 180 | 183   | 219 | 220   | 197  | 197   | 244 | 244   | 352  | 352  |
| SL05 | 192   | 192   | 394 | 394   | 235 | 238   | 165  | 165   | 273  | 273   | 178 | 180   | 220 | 220   | 197  | 197   | 242 | 244   | 352  | 358  |
| SL06 | 192   | 192   | 394 | 394   | 235 | 238   | #N/A | #N/A  | #N/A | #N/A  | 185 | 206   | 219 | 220   | 197  | 197   | 238 | 244   | 352  | 358  |
| SL07 | 192   | 192   | 394 | 394   | 232 | 235   | 165  | 165   | 273  | 273   | 185 | 200   | 219 | 220   | 197  | 197   | 244 | 244   | 352  | 352  |
| SL08 | 192   | 192   | 394 | 394   | 235 | 238   | #N/A | #N/A  | 273  | 273   | 185 | 187   | 219 | 219   | #N/A | #N/A  | 244 | 244   | #N/A | #N/A |
| SL09 | 192   | 192   | 394 | 394   | 235 | 238   | 165  | 165   | 273  | 273   | 180 | 187   | 220 | 220   | 195  | 197   | 242 | 244   | 352  | 352  |
| SL10 | 192   | 192   | 394 | 394   | 235 | 235   | 165  | 165   | 273  | 273   | 185 | 206   | 220 | 220   | 195  | 197   | 244 | 244   | 352  | 358  |
| SL11 | 192   | 192   | 394 | 394   | 235 | 235   | 163  | 165   | 273  | 273   | 176 | 189   | 220 | 220   | 197  | 197   | 244 | 244   | 352  | 352  |

| ind  | lat05 | lat08 |      | lat09 |      | lat15 |      | lat18 |      | lat19 |     | lat25 |     | lat33 |     | lat34 |      | lat37 |      |      |
|------|-------|-------|------|-------|------|-------|------|-------|------|-------|-----|-------|-----|-------|-----|-------|------|-------|------|------|
| SL12 | 192   | 192   | 394  | 394   | 235  | 238   | 165  | 165   | 273  | 273   | 180 | 183   | 219 | 220   | 195 | 197   | 242  | 244   | 352  | 352  |
| SL13 | 192   | 194   | 394  | 394   | 235  | 235   | 165  | 165   | 273  | 273   | 180 | 206   | 220 | 220   | 197 | 197   | 242  | 244   | 352  | 358  |
| SL14 | 192   | 192   | 394  | 394   | 235  | 238   | 163  | 165   | 273  | 273   | 180 | 183   | 220 | 220   | 197 | 199   | 242  | 244   | 352  | 354  |
| SL15 | 192   | 192   | 394  | 394   | 235  | 238   | 163  | 163   | 273  | 273   | 178 | 183   | 219 | 220   | 195 | 197   | 244  | 244   | 352  | 352  |
| SL16 | 192   | 194   | 394  | 394   | 238  | 238   | 165  | 165   | 273  | 273   | 185 | 208   | 219 | 220   | 197 | 197   | 244  | 244   | 352  | 352  |
| SL17 | 192   | 192   | 394  | 394   | 238  | 238   | #N/A | #N/A  | #N/A | #N/A  | 178 | 180   | 220 | 220   | 197 | 197   | #N/A | #N/A  | 352  | 352  |
| SL18 | 192   | 192   | 394  | 394   | 235  | 238   | 165  | 165   | #N/A | #N/A  | 180 | 206   | 220 | 220   | 195 | 197   | 238  | 242   | 352  | 358  |
| SL19 | 192   | 192   | 394  | 394   | 235  | 238   | 165  | 165   | 273  | 273   | 180 | 202   | 219 | 219   | 197 | 197   | 242  | 244   | 352  | 352  |
| SL20 | 192   | 192   | 394  | 394   | 235  | 238   | 165  | 165   | 273  | 273   | 180 | 208   | 219 | 220   | 197 | 197   | 244  | 244   | #N/A | #N/A |
| SL21 | 192   | 194   | 394  | 394   | 235  | 235   | 165  | 165   | 273  | 273   | 180 | 185   | 219 | 220   | 197 | 197   | 242  | 244   | 352  | 352  |
| SL22 | 192   | 192   | 394  | 394   | 235  | 235   | 165  | 165   | 273  | 273   | 180 | 183   | 219 | 220   | 197 | 199   | 244  | 244   | 352  | 352  |
| SL23 | 192   | 192   | 394  | 394   | 235  | 238   | 165  | 165   | 273  | 273   | 180 | 185   | 219 | 220   | 197 | 197   | 238  | 242   | 352  | 358  |
| SL24 | 192   | 192   | 394  | 394   | 235  | 238   | 163  | 165   | 273  | 273   | 180 | 187   | 219 | 219   | 197 | 199   | 242  | 244   | 352  | 352  |
| SL25 | 192   | 192   | 394  | 394   | 235  | 235   | 165  | 165   | #N/A | #N/A  | 180 | 180   | 220 | 220   | 197 | 197   | 238  | 242   | 358  | 358  |
| SL26 | 192   | 192   | 394  | 394   | 235  | 235   | 165  | 165   | 273  | 273   | 178 | 183   | 220 | 220   | 195 | 197   | 242  | 242   | 350  | 352  |
| SL27 | 192   | 192   | 394  | 394   | 235  | 235   | 163  | 165   | 273  | 273   | 180 | 185   | 219 | 220   | 195 | 197   | 242  | 246   | 350  | 352  |
| SL28 | 192   | 192   | 394  | 394   | 235  | 235   | 165  | 165   | 273  | 273   | 185 | 187   | 219 | 220   | 197 | 197   | 242  | 244   | 352  | 358  |
| SL29 | 192   | 192   | 394  | 394   | 238  | 238   | 165  | 165   | 273  | 273   | 180 | 180   | 220 | 220   | 197 | 199   | 242  | 244   | 352  | 358  |
| SL30 | 192   | 192   | 394  | 394   | 235  | 235   | 165  | 165   | #N/A | #N/A  | 178 | 180   | 219 | 220   | 195 | 199   | 244  | 250   | 358  | 358  |
| SL31 | 192   | 192   | 394  | 394   | 238  | 244   | 165  | 165   | 273  | 275   | 174 | 180   | 219 | 219   | 197 | 199   | 244  | 244   | 352  | 358  |
| SN01 | 192   | 192   | 394  | 394   | 235  | 235   | 165  | 165   | 273  | 273   | 180 | 202   | 220 | 220   | 195 | 197   | 238  | 244   | 352  | 352  |
| SN02 | 192   | 192   | 394  | 394   | 235  | 235   | 165  | 165   | #N/A | #N/A  | 180 | 202   | 220 | 220   | 195 | 197   | 238  | 244   | #N/A | #N/A |
| SN03 | 192   | 192   | 394  | 394   | 235  | 235   | 163  | 165   | 273  | 273   | 185 | 193   | 220 | 220   | 195 | 197   | 244  | 248   | 352  | 352  |
| SN04 | 192   | 192   | 394  | 394   | 235  | 235   | 163  | 167   | 273  | 273   | 180 | 200   | 220 | 220   | 195 | 197   | 244  | 244   | 350  | 352  |
| SN05 | 192   | 192   | 394  | 394   | 235  | 235   | 165  | 165   | 273  | 273   | 180 | 185   | 220 | 220   | 197 | 197   | 244  | 244   | 352  | 352  |
| SN06 | #N/A  | #N/A  | 394  | 394   | #N/A | #N/A  | 165  | 165   | 273  | 273   | 183 | 206   | 220 | 220   | 195 | 197   | 244  | 244   | 352  | 352  |
| SN07 | 192   | 192   | 394  | 394   | 235  | 235   | 163  | 165   | 273  | 273   | 180 | 187   | 220 | 220   | 195 | 197   | 244  | 244   | 352  | 352  |
| SN08 | 192   | 192   | 394  | 394   | 235  | 238   | 163  | 165   | 271  | 273   | 180 | 183   | 220 | 220   | 195 | 197   | 238  | 242   | 352  | 352  |
| SN09 | 192   | 192   | #N/A | #N/A  | 235  | 238   | 165  | 165   | 273  | 275   | 195 | 198   | 220 | 220   | 197 | 197   | 242  | 244   | 352  | 358  |
| SN10 | 192   | 192   | 394  | 394   | 235  | 238   | 165  | 165   | 275  | 275   | 183 | 185   | 220 | 220   | 195 | 197   | 244  | 244   | 352  | 352  |
| SN11 | 192   | 192   | 394  | 394   | 235  | 238   | 163  | 163   | 273  | 273   | 183 | 187   | 220 | 220   | 197 | 197   | 244  | 244   | 352  | 352  |
| SN12 | 192   | 192   | 394  | 394   | 235  | 238   | 165  | 165   | #N/A | #N/A  | 185 | 187   | 220 | 220   | 195 | 197   | 244  | 244   | 352  | 352  |

| ind  | lat05 | lat08 |      | lat09 |      | lat15 |      | lat18 |      | lat19 |     | lat25 |      | lat33 |     | lat34 |     | lat37 |      |      |
|------|-------|-------|------|-------|------|-------|------|-------|------|-------|-----|-------|------|-------|-----|-------|-----|-------|------|------|
| SN13 | 192   | 192   | 394  | 394   | 235  | 238   | 163  | 163   | 273  | 273   | 183 | 185   | 220  | 220   | 197 | 197   | 244 | 244   | 352  | 352  |
| SN14 | 192   | 192   | 394  | 394   | 235  | 235   | 165  | 165   | 273  | 273   | 187 | 187   | 220  | 220   | 197 | 197   | 238 | 244   | #N/A | #N/A |
| SN15 | 192   | 192   | 394  | 394   | 235  | 235   | 163  | 167   | 273  | 273   | 183 | 183   | 220  | 220   | 197 | 197   | 242 | 250   | 352  | 358  |
| SN16 | 192   | 192   | 394  | 394   | 235  | 235   | 163  | 165   | 271  | 271   | 185 | 198   | 220  | 220   | 195 | 195   | 244 | 250   | 352  | 358  |
| SN17 | 192   | 192   | 394  | 394   | 235  | 238   | 165  | 165   | 273  | 275   | 187 | 187   | 220  | 220   | 197 | 197   | 238 | 250   | 352  | 352  |
| SN18 | 192   | 192   | 394  | 394   | 238  | 238   | 163  | 165   | 273  | 273   | 180 | 180   | 220  | 220   | 197 | 197   | 244 | 244   | 352  | 352  |
| SN19 | 192   | 192   | 394  | 394   | 235  | 235   | 165  | 165   | 271  | 275   | 183 | 185   | 220  | 220   | 195 | 197   | 238 | 238   | 352  | 352  |
| SN21 | 192   | 192   | 394  | 394   | 235  | 235   | 165  | 165   | 273  | 275   | 185 | 185   | 220  | 220   | 197 | 197   | 244 | 244   | 352  | 352  |
| SN22 | 192   | 192   | 394  | 394   | 235  | 235   | 165  | 165   | #N/A | #N/A  | 181 | 187   | 220  | 220   | 195 | 195   | 238 | 238   | 352  | 352  |
| SN23 | 192   | 192   | 394  | 394   | 235  | 235   | 165  | 165   | 273  | 273   | 180 | 187   | 220  | 220   | 195 | 195   | 242 | 244   | 352  | 352  |
| SN24 | 192   | 194   | 394  | 394   | 235  | 238   | 165  | 165   | #N/A | #N/A  | 180 | 180   | 219  | 220   | 195 | 197   | 244 | 244   | 352  | 352  |
| SN25 | 192   | 192   | 394  | 394   | 235  | 235   | 165  | 165   | 273  | 273   | 178 | 185   | 220  | 220   | 195 | 197   | 244 | 244   | 352  | 352  |
| SN26 | 192   | 192   | 394  | 394   | 235  | 235   | #N/A | #N/A  | 273  | 273   | 178 | 183   | 220  | 220   | 195 | 197   | 244 | 244   | #N/A | #N/A |
| SN27 | 192   | 192   | 394  | 394   | 235  | 235   | 165  | 165   | 273  | 273   | 180 | 185   | 220  | 220   | 197 | 197   | 238 | 244   | 352  | 352  |
| SN28 | 192   | 192   | 394  | 394   | 235  | 235   | 163  | 165   | 273  | 275   | 183 | 185   | 220  | 220   | 197 | 197   | 242 | 244   | 352  | 352  |
| SN29 | #N/A  | #N/A  | 394  | 394   | 235  | 235   | 165  | 165   | 275  | 275   | 180 | 185   | 220  | 220   | 195 | 195   | 244 | 244   | 352  | 352  |
| SN30 | 192   | 192   | 394  | 394   | #N/A | #N/A  | 163  | 165   | #N/A | #N/A  | 185 | 189   | #N/A | #N/A  | 195 | 195   | 244 | 244   | 352  | 352  |
| SS01 | #N/A  | #N/A  | 394  | 394   | 235  | 238   | 165  | 165   | 273  | 273   | 180 | 185   | 219  | 219   | 197 | 197   | 238 | 244   | 352  | 352  |
| SS02 | #N/A  | #N/A  | #N/A | #N/A  | 235  | 235   | 165  | 165   | 273  | 273   | 178 | 180   | 219  | 219   | 197 | 197   | 242 | 244   | 352  | 352  |
| SS03 | #N/A  | #N/A  | 394  | 394   | 235  | 238   | 165  | 165   | 273  | 275   | 178 | 187   | 219  | 219   | 197 | 197   | 242 | 244   | 352  | 352  |
| SS04 | #N/A  | #N/A  | 389  | 394   | 235  | 238   | 165  | 165   | 273  | 273   | 176 | 191   | 219  | 219   | 197 | 197   | 242 | 242   | 352  | 352  |
| SS05 | #N/A  | #N/A  | 394  | 394   | 235  | 238   | 165  | 165   | 273  | 275   | 180 | 185   | 219  | 219   | 197 | 199   | 242 | 244   | 352  | 352  |
| SS06 | #N/A  | #N/A  | 394  | 394   | 235  | 235   | 165  | 165   | 273  | 273   | 178 | 180   | 219  | 219   | 197 | 197   | 242 | 244   | 352  | 352  |
| SW01 | 192   | 192   | 389  | 394   | 235  | 235   | 165  | 165   | #N/A | #N/A  | 176 | 176   | 219  | 219   | 197 | 197   | 242 | 242   | 352  | 352  |
| SW02 | 192   | 192   | 389  | 394   | 235  | 235   | 165  | 165   | 275  | 275   | 176 | 176   | 219  | 219   | 197 | 197   | 242 | 242   | 352  | 352  |
| SW03 | 192   | 192   | 389  | 389   | 235  | 235   | 165  | 165   | #N/A | #N/A  | 176 | 176   | 219  | 219   | 197 | 197   | 242 | 242   | 352  | 352  |
| SW04 | 192   | 192   | 389  | 394   | 235  | 235   | 165  | 165   | #N/A | #N/A  | 176 | 176   | 219  | 219   | 197 | 197   | 242 | 242   | 352  | 352  |
| SW05 | 192   | 192   | 389  | 389   | 235  | 235   | 165  | 165   | #N/A | #N/A  | 176 | 176   | 219  | 219   | 197 | 197   | 242 | 242   | 352  | 352  |
| SW06 | 192   | 192   | 389  | 389   | 235  | 235   | 165  | 165   | #N/A | #N/A  | 176 | 176   | 219  | 219   | 197 | 197   | 242 | 242   | 352  | 352  |
| SW07 | 192   | 192   | 389  | 394   | 235  | 235   | 165  | 165   | #N/A | #N/A  | 176 | 176   | 219  | 219   | 197 | 197   | 242 | 242   | 352  | 352  |
| SW08 | 192   | 192   | 389  | 394   | 235  | 235   | 165  | 165   | 275  | 275   | 176 | 176   | 219  | 219   | 197 | 197   | 242 | 242   | #N/A | #N/A |
| SW09 | 192   | 192   | 389  | 389   | 235  | 235   | 165  | 165   | 275  | 275   | 176 | 176   | 219  | 219   | 197 | 197   | 242 | 242   | 352  | 352  |

| ind  | lat05 | lat08 |      | lat09 |      | lat15 |      | lat18 |      | lat19 |     | lat25 |      | lat33 |      | lat34 |      |      | lat37 |      |
|------|-------|-------|------|-------|------|-------|------|-------|------|-------|-----|-------|------|-------|------|-------|------|------|-------|------|
| SW10 | 192   | 192   | #N/A | #N/A  | #N/A | #N/A  | #N/A | #N/A  | #N/A | #N/A  | 176 | 176   | #N/A | #N/A  | 197  | 197   | 242  | 242  | #N/A  | #N/A |
| SW11 | 192   | 192   | 389  | 389   | 235  | 235   | 165  | 165   | 275  | 275   | 176 | 176   | 219  | 219   | 197  | 197   | 242  | 242  | 352   | 352  |
| SW12 | #N/A  | #N/A  | 389  | 389   | 235  | 235   | 165  | 165   | 275  | 275   | 176 | 176   | 219  | 219   | 197  | 197   | 242  | 242  | 352   | 352  |
| SW13 | #N/A  | #N/A  | #N/A | #N/A  | 235  | 235   | #N/A | #N/A  | #N/A | #N/A  | 176 | 176   | 219  | 219   | 197  | 197   | 242  | 242  | 352   | 352  |
| SW14 | 192   | 192   | #N/A | #N/A  | 235  | 235   | 163  | 165   | #N/A | #N/A  | 176 | 176   | 219  | 219   | #N/A | #N/A  | #N/A | #N/A | #N/A  | #N/A |
| SW15 | 192   | 192   | #N/A | #N/A  | 235  | 235   | #N/A | #N/A  | #N/A | #N/A  | 176 | 176   | 219  | 219   | 197  | 197   | 242  | 242  | #N/A  | #N/A |
| SW16 | 192   | 192   | 389  | 389   | 235  | 235   | 165  | 165   | #N/A | #N/A  | 176 | 176   | 219  | 219   | 197  | 197   | 242  | 242  | 352   | 352  |
| SW17 | #N/A  | #N/A  | #N/A | #N/A  | 235  | 238   | 165  | 165   | #N/A | #N/A  | 176 | 176   | 219  | 219   | 197  | 197   | 242  | 242  | #N/A  | #N/A |
| SW18 | 192   | 192   | 389  | 394   | 235  | 235   | #N/A | #N/A  | #N/A | #N/A  | 176 | 176   | 219  | 219   | 197  | 197   | 242  | 242  | 352   | 352  |
| SW19 | 192   | 192   | 394  | 394   | 235  | 235   | 165  | 165   | 275  | 275   | 176 | 176   | 219  | 219   | 197  | 197   | 242  | 242  | 352   | 352  |
| SW20 | 192   | 192   | 394  | 394   | 235  | 235   | 165  | 165   | 275  | 275   | 176 | 176   | 219  | 219   | 197  | 197   | 242  | 242  | #N/A  | #N/A |
| SW21 | 192   | 192   | 389  | 394   | 235  | 235   | 165  | 165   | 275  | 275   | 176 | 176   | 219  | 219   | 197  | 197   | 242  | 242  | 352   | 352  |
| SW22 | 192   | 192   | 389  | 389   | 235  | 235   | 165  | 165   | 275  | 275   | 176 | 176   | 219  | 219   | 197  | 197   | 242  | 242  | 352   | 352  |
| SW23 | 192   | 192   | 394  | 394   | 235  | 235   | 165  | 165   | 275  | 275   | 176 | 176   | 219  | 219   | 197  | 197   | 242  | 242  | 352   | 352  |
| SW24 | 192   | 192   | 389  | 389   | 235  | 235   | 165  | 165   | 275  | 275   | 176 | 176   | 219  | 219   | 197  | 197   | 242  | 242  | 352   | 352  |
| SW25 | 192   | 192   | 394  | 394   | 235  | 235   | 165  | 165   | 275  | 275   | 176 | 176   | 219  | 219   | 197  | 197   | 242  | 242  | 352   | 352  |
| SW26 | 192   | 192   | 394  | 394   | 235  | 235   | 165  | 165   | 275  | 275   | 176 | 176   | 219  | 219   | 197  | 197   | 242  | 242  | 352   | 352  |
| SW27 | 192   | 192   | 394  | 394   | 235  | 235   | 165  | 165   | 275  | 275   | 176 | 176   | 219  | 219   | 197  | 197   | 242  | 242  | 352   | 352  |
| SW28 | 192   | 192   | 394  | 394   | 235  | 235   | 165  | 165   | 275  | 275   | 176 | 176   | 219  | 219   | 197  | 197   | 242  | 242  | 352   | 352  |
| SW29 | 192   | 192   | 394  | 394   | 235  | 235   | 165  | 165   | 275  | 275   | 176 | 176   | 219  | 219   | 197  | 197   | 242  | 242  | 352   | 352  |
| SW30 | 192   | 192   | 394  | 394   | 235  | 235   | 165  | 165   | #N/A | #N/A  | 176 | 176   | 219  | 219   | 197  | 197   | 242  | 242  | 352   | 352  |
