# Supplementary material for: Strong population structure but no equilibrium yet: Genetic connectivity and phylogeography in the kelp Saccharina latissima (Laminariales, Phaeophyta)
Source: PubMed Central journal article supplement (PMC5916297; doi:10.1002/ece3.3968), 2018-04-02
Supplement: ECE3-8-4265-s004.pdf [file ECE3-8-4265-s004.pdf]

Table S3 - Haplotype frequencies for partial cytochrome-c-oxidase I sequences for *Saccharina* spp. at various sampling locations. For abbreviations of sampling locations see Fig. 2 and Table 1.

|       | SL | SN | SF | SS | SD | SW | SI | SB | ARC* | NEP* | NWA* | FA* | IR* | S. c.** | S. j.** | total |
|-------|----|----|----|----|----|----|----|----|------|------|------|-----|-----|---------|---------|-------|
| a     |    |    |    |    | 3  |    |    |    |      |      |      |     |     |         |         | 3     |
| b     |    |    |    |    | 1  |    |    |    |      |      |      |     |     |         |         | 1     |
| c     |    |    |    |    |    | 25 |    |    |      |      |      |     |     |         |         | 25    |
| d     |    |    |    |    |    |    | 1  |    |      |      |      |     |     |         |         | 1     |
| e     | 19 | 29 | 1  | 2  | 18 |    | 29 | 1  |      |      |      | 1   | 1   |         |         | 101   |
| f     |    |    |    |    |    |    |    | 32 |      |      |      |     |     |         |         | 32    |
| g     |    |    | 29 | 1  |    |    |    |    |      |      |      |     |     |         |         | 30    |
| h     |    |    |    |    |    |    |    | 7  |      |      | 42   |     |     |         |         | 49    |
| i     |    |    |    |    |    |    |    |    |      |      | 1    |     |     |         |         | 1     |
| j     |    |    |    |    |    |    |    |    |      |      | 1    |     |     |         |         | 1     |
| k     |    |    |    |    |    |    |    | 16 | 5    |      |      |     |     |         |         | 21    |
| l     |    |    |    |    |    |    |    |    |      |      | 1    |     |     |         |         | 1     |
| m     |    |    |    |    |    |    |    | 1  |      |      |      |     |     |         |         | 1     |
| n     |    |    |    |    |    |    |    | 4  |      |      |      |     |     |         |         | 4     |
| o     |    |    |    |    |    |    |    |    | 1    |      |      |     |     |         |         | 1     |
| p     |    |    |    |    |    |    |    |    |      |      | 1    |     |     |         |         | 1     |
| q     |    |    |    |    |    |    |    |    |      |      | 1    |     |     |         |         | 1     |
| r     |    |    |    |    |    |    |    |    |      |      |      | 3   |     |         |         | 3     |
| s     |    |    |    |    |    |    |    |    |      |      |      |     |     | 8       |         | 8     |
| t     |    |    |    |    |    |    |    |    |      |      |      |     |     |         | 1       | 1     |
| u     |    |    |    |    |    |    |    |    |      |      |      |     |     |         | 2       | 2     |
| v     |    |    |    |    |    |    |    |    |      |      |      |     |     |         | 14      | 14    |
| total | 19 | 29 | 30 | 3  | 22 | 25 | 30 | 33 | 28   | 6    | 47   | 4   | 1   | 8       | 17      | 302   |

\*) re-analyzed from McDevit & Saunders (2010); \*\*) re-analyzed from Balakirev *et al.* (2012); S. c. = *Saccharina cichoriodes*; S. j. = *Saccharina japonica*.
